# Supplementary material
Source: PubMed Central journal article supplement (PMC2629187)
Supplement: 0810940106_0810940106SI.pdf [file 0810940106_0810940106SI.pdf]

# Supporting Information

López *et al.* 10.1073/pnas.0810940106

1. Ivey DM, *et al.* (1993) Cloning and characterization of a putative Ca<sup>2+</sup>/H<sup>+</sup> antiporter gene from *Escherichia coli* upon functional complementation of Na<sup>+</sup>/H<sup>+</sup> antiporter-deficient strains by the overexpressed gene. *J Biol Chem* 268:11296–11303.
2. Reuber TL, Ausubel FM (1996) Isolation of *Arabidopsis* genes that differentiate between resistance responses mediated by the RPS2 and RPM1 disease resistance genes. *Plant Cell* 8:241–249.
3. Holtmann G, Bakker EP, Uozumi N, Bremer E (2003) Isolation of *Arabidopsis* genes that differentiate between resistance responses mediated by the RPS2 and RPM1 disease resistance genes. *J Bacteriol* 185:1289–1298.
4. Endo T, Uratani B, Freese E (1983) Purine salvage pathways of *Bacillus subtilis* and effect of guanine on growth of GMP reductase mutants. *J Bacteriol* 155:169–179.

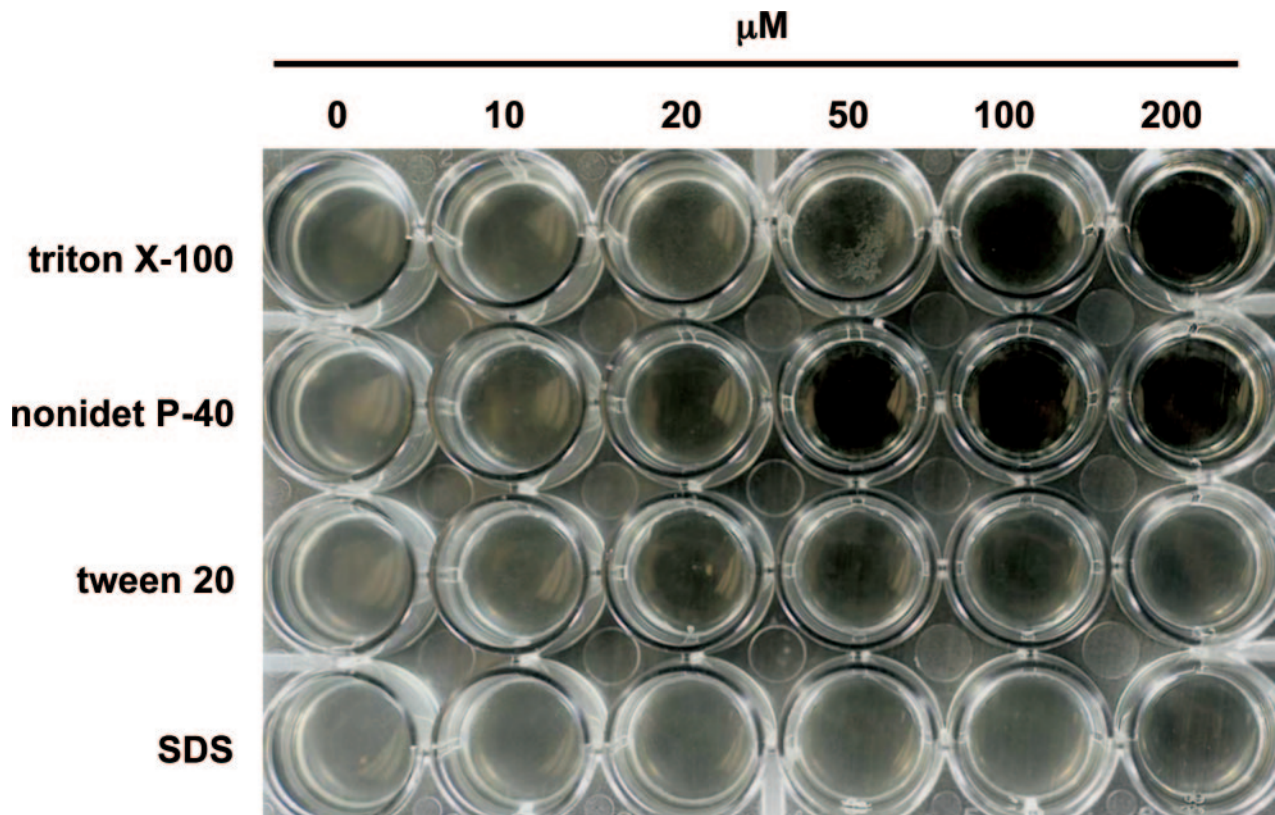

**Fig. S1.** Membrane disruption is not the mechanism associated to surfactin and nystatin in biofilm formation. Pellicle formation assays were performed to test biofilm formation effects by the addition of detergents. Detergents listed were tested in different concentrations to determine whether they induced pellicle formation. No pellicle formation ability was associated with any of them. Cell lysis was observed at concentrations above 50  $\mu\text{M}$ .

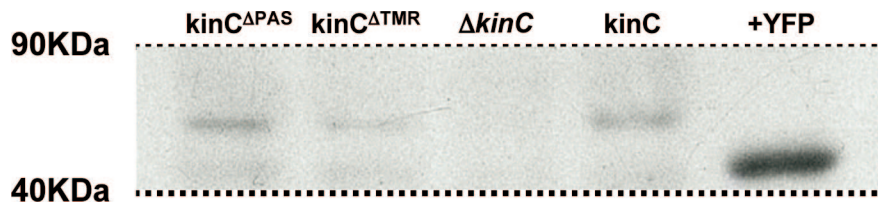

**Fig. S2.** Western immunoblot to confirm the expression of the KinC variants in *B. subtilis*. All constructs that contained a fused YFP could be detected with anti-YFP antibodies. Interestingly, the *kinC*<sup>ΔTMR</sup> allele yields less protein, which might explain the reduced complementation seen in Fig. 3C. These results thus strongly argue that the PAS-PAC domain of KinC is responsible for sensing potassium leakage.

**A**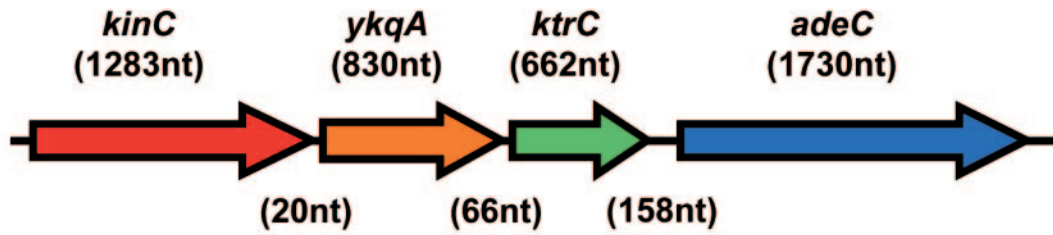**B**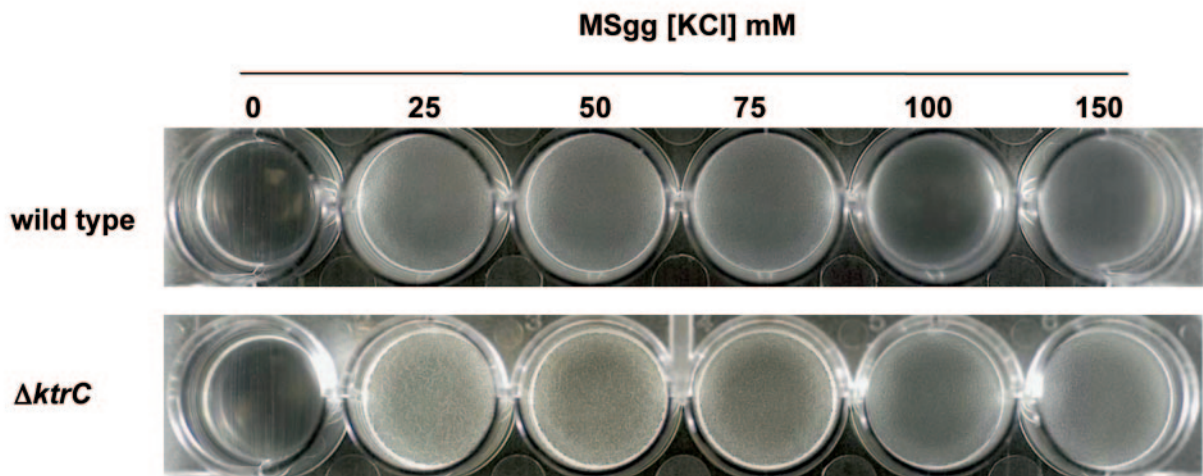

**Fig. S3.** (A) The *kinC* genetic locus. The 3 genes downstream of *kinC* are shown. The predicted proteins encoded by these 3 genes display sequence similarity to *ykqA*-AIG2 and ChaC family of proteins that bind small ligands. Both families have unknown function, but they might be related to the transport of cations (1, 2). *ktrC*, potassium channel regulator (3); *adeC*, adenine deaminase related to purine salvage (4). (B) Deletion of *ktrC* enhances biofilm formation possibly by affecting potassium reuptake. Wild type and  $\Delta ktrC$  were grown in MSgg medium with different concentrations of potassium. In the absence of potassium, no growth was detected as expected because potassium is essential. At 25 mM potassium the  $\Delta ktrC$  mutant forms a much more robust biofilm than the wild type. However, for both wild-type and mutant strains, biofilm formation is still suppressed by high concentrations of potassium.

**Table S1. Small molecules/natural products tested**

| Molecule     | Function                       | Structure         | Pellicle formation |
|--------------|--------------------------------|-------------------|--------------------|
| Nystatin     | Cation-selective pore former   | Macrolide polyene | Yes                |
| Amphotericin | Cation-selective pore former   | Macrolide polyene | Yes                |
| Gramicidin   | Cation-selective pore former   | Peptide           | Yes                |
| Surfactin    | Cation-selective pore former   | Lipopeptide       | Yes                |
| Valinomycin  | Potassium-selective ionophore  | Peptide           | Yes                |
| Filipin      | Cell wall disaggregator        | Macrolide polyene | No                 |
| Iturin       | Anion-selective pore former    | Lipopeptide       | No                 |
| Nisin        | Nonselective pore former       | Peptide           | No                 |
| Polymyxin    | Cell wall disaggregator        | Lipopeptide       | No                 |
| Bacitracin   | Cell wall synthesis inhibitor  | Peptide           | No                 |
| Vancomycin   | Cell wall synthesis inhibitor  | Glycopeptide      | No                 |
| Aculeacin    | Cell wall synthesis inhibitor  | Lipopeptide       | No                 |
| Microcystin  | Protein phosphatase inhibitor  | Peptide           | No                 |
| Syringomycin | Nonselective pore former       | Lipopeptide       | No                 |
| Nonactin     | Ammonium-selective pore former | Peptide           | No                 |
| Novobiocin   | DNA gyrase inhibitor           | Glycoside         | No                 |
| Stigmatellin | Electron transport inhibitor   | Quinone polyene   | No                 |
| Antimycin    | Electron transport inhibitor   | Lipopeptide       | No                 |

Table shows a battery of small molecules tested for their ability to induce the formation of pellicle in LB cultures of *B. subtilis*. The molecules were selected according to their functionality or their similarity to surfactin or nystatin. Purified molecules and information about their mechanism of action were obtained from Sigma-Aldrich. Concentrations used covered a range between 0 and 100  $\mu\text{M}$ . Growth inhibition and cell lysis were not observed at any concentration tested with the following natural products: nystatin, amphotericin, surfactin, iturin, aculeacin, and microcystin. For valinomycin and gramicidin, pellicle formation was observed at 3  $\mu\text{M}$ , 10-fold less than the concentration needed for growth inhibition.

Table S2. Strain list

| Strain | Genotype                                                                                         | Source     |
|--------|--------------------------------------------------------------------------------------------------|------------|
| DL1    | NCIB3610 wild type                                                                               | 1          |
| DL5    | $\Delta sinR::spc$                                                                               | 2          |
| DL107  | $\Delta srfAA::mIs$                                                                              | 1          |
| SSB602 | $\Delta sinR::spc \Delta srfAA::mIs$                                                             | This study |
| DL227  | $\Delta kinC::mIs$                                                                               | 3          |
| DL153  | $\Delta kinD::tet$                                                                               | This study |
| DL99   | $\Delta kinC::mIs \Delta kinD::tet$                                                              | This study |
| DL340  | Wild type <i>amyE::kinC</i>                                                                      | This study |
| DL348  | Wild type <i>amyE::kinC<sup>ΔTMR</sup></i>                                                       | This study |
| DL356  | Wild type <i>amyE::kinC<sup>ΔPAS</sup></i>                                                       | This study |
| DL344  | $\Delta kinC::mIs amyE::kinC$                                                                    | This study |
| DL352  | $\Delta kinC::mIs amyE::kinCΔTMR}$                                                               | This study |
| DL360  | $\Delta kinC::mIs amyE::kinCΔPAS}$                                                               | This study |
| DL368  | $\Delta kinD::tet amyE::kinC$                                                                    | This study |
| DL370  | $\Delta kinD::tet amyE::kinCΔTMR}$                                                               | This study |
| DL372  | $\Delta kinD::tet amyE::kinCΔPAS}$                                                               | This study |
| DL374  | $\Delta kinC::mIs \Delta kinD::tet amyE::kinC$                                                   | This study |
| DL376  | $\Delta kinC::mIs \Delta kinD::tet amyE::kinCΔTMR}$                                              | This study |
| DL378  | $\Delta kinC::mIs \Delta kinD::tet amyE::kinCΔPAS}$                                              | This study |
| DL79   | Wild type <i>amyE::P<sub>yqxM</sub>-lacZ</i>                                                     | This study |
| DL382  | Wild type <i>amyE::P<sub>yqxM</sub>-yfp</i>                                                      | This study |
| DL215  | $\Delta kinC::mIs amyE::PyqxM-yfp$                                                               | This study |
| DL456  | $\Delta kinC::mIs lacA::PyqxM-yfp$                                                               | This study |
| DL449  | $\Delta kinC::mIs amyE::kinC lacA::PyqxM-yfp$                                                    | This study |
| DL451  | $\Delta kinC::mIs amyE::kinCΔTMR} lacA::PyqxM-yfp$                                               | This study |
| DL453  | $\Delta kinC::mIs amyE::kinCΔPAS} lacA::PyqxM-yfp$                                               | This study |
| DL346  | $\Delta kinC::mIs amyE::kinC-yfp$                                                                | This study |
| DL354  | $\Delta kinC::mIs amyE::kinCΔTMR}-yfp$                                                           | This study |
| DL362  | $\Delta kinC::mIs amyE::kinCΔPAS}-yfp$                                                           | This study |
| DL447  | $\Delta degS::tet$                                                                               | This study |
| DL474  | $\Delta degS::tet amyE::kinC-degS$                                                               | This study |
| DL492  | $\Delta degS::tet amyE::kinC-degS lacA::PaprE}-lacZ$                                             | This study |
| DL272  | $\Delta ktrC::tet$                                                                               | This study |
| DL987  | <i>L. monocytogenes tRNA<sup>Arg</sup>Ω pPL2-P<sub>skf</sub>-Cfp</i>                             | This study |
| DL989  | <i>L. monocytogenes tRNA<sup>Arg</sup>Ω pPL2-kinC-spo0A-P<sub>skf</sub>-Cfp</i>                  | This study |
| DL1046 | <i>L. monocytogenes tRNA<sup>Arg</sup>Ω pPL2 -kinC<sup>ΔPAS}-spo0A-P<sub>skf</sub>-Cfp</sup></i> | This study |

1. Branda SS, Gonzalez-Pastor JE, Ben-Yehuda S, Losick R, Kolter R (2001) Fruiting body formation by *Bacillus subtilis*. *Proc Natl Acad Sci USA* 98(20):11621–11626.

2. Heytler PG, Prichard WW (1962) A new class of uncoupling agents—Carbonyl cyanide phenylhydrazones. *Biochem Biophys Res Commun* 7:272–275.

3. Magnuson R, Solomon J, Grossman AD (1994) Biochemical and genetic characterization of a competence pheromone from *B. subtilis*. *Cell* 77(2):207–216.
